# Supplementary material for: Correlation of Lung Collapse and Gas Exchange - A Computer Tomographic Study in Sheep and Pigs with Atelectasis in Otherwise Normal Lungs
Source: PubMed Central journal article supplement (PMC4530863; doi:10.1371/journal.pone.0135272), 2015-08-10

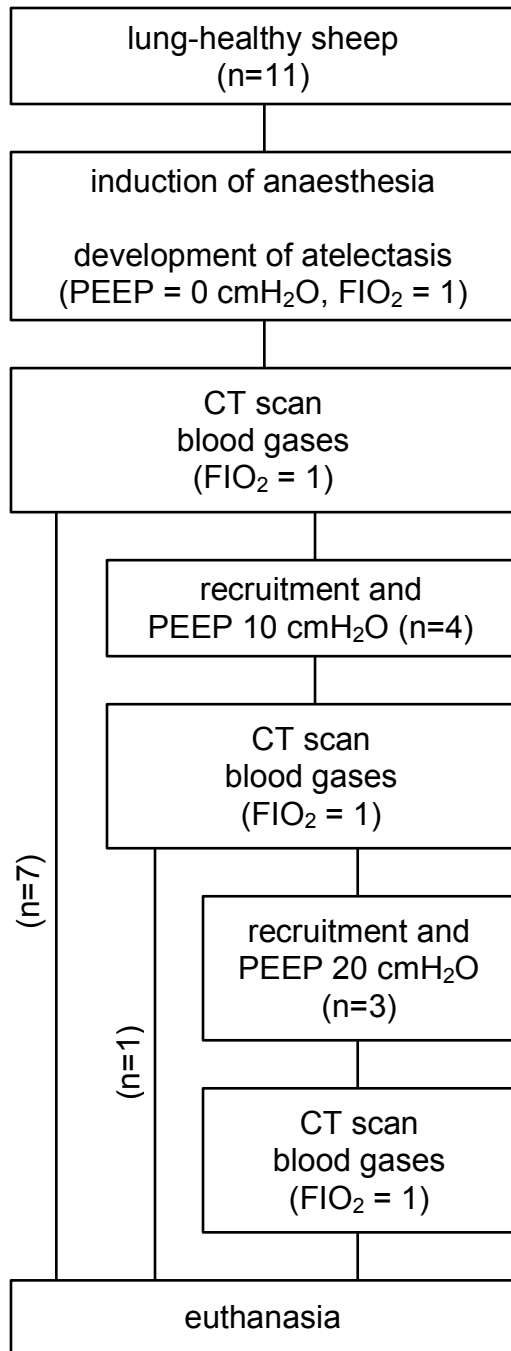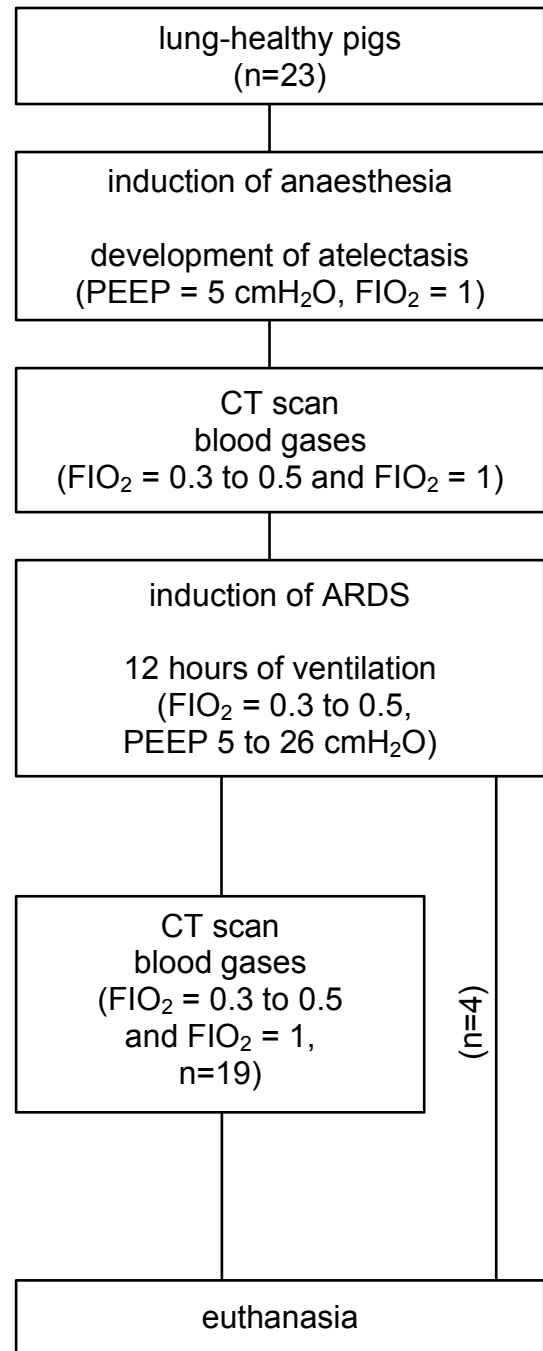

Supplement: pone.0135272.s001.pdf [file pone.0135272.s001.pdf]
